# Supplementary material
Source: PubMed Central journal article supplement (PMC5594743)
Supplement: NIHMS858972-supplement-Appendix.pdf [file NIHMS858972-supplement-Appendix.pdf]

## Supplementary Appendix

This appendix has been provided by the authors to give readers additional information about their work.

Supplement to: Kantarjian HM, DeAngelo DJ, Stelljes M, et al. Inotuzumab ozogamicin versus standard therapy for acute lymphoblastic leukemia. *N Engl J Med* 2016;375:740-53. DOI: 10.1056/NEJMoa1509277

## SUPPLEMENTARY APPENDIX

### **Inotuzumab Ozogamicin Versus Standard Care for Acute Lymphoblastic Leukemia**

Hagop M. Kantarjian, MD, Daniel J. DeAngelo, MD, PhD, Matthias Stelljes, MD, Giovanni Martinelli, MD, Michaela Liedtke, MD, Wendy Stock, MD, Nicola Gökbuget, MD, Susan O'Brien, MD, Kongming Wang, PhD, Tao Wang, PhD, M. Luisa Paccagnella, PhD, Barbara Sleight, MD, Erik Vandendries, MD, PhD, Anjali S. Advani, MD

#### **Table of Contents**

|                                                                                                                             |    |
|-----------------------------------------------------------------------------------------------------------------------------|----|
| Study Investigators.....                                                                                                    | 2  |
| Additional Methods .....                                                                                                    | 4  |
| a. Eligibility Criteria .....                                                                                               | 4  |
| b. Recommended Dose Modifications .....                                                                                     | 5  |
| c. Hematologic Remission Assessed by the Endpoint Adjudication Committee .....                                              | 6  |
| d. Definitions of Duration of Remission, Overall Survival and Progression-Free Survival.....                                | 7  |
| e. Definition and Confirmation of Venous-occlusive Disease.....                                                             | 7  |
| f. Details of Statistical Analyses .....                                                                                    | 8  |
| Figure S1. Patient Disposition. ....                                                                                        | 9  |
| Figure S2. Duration of Remission by Minimal Residual Disease Status. ....                                                   | 11 |
| Table S1. All-Cause and Treatment-Related Treatment-Emergent Adverse Events.....                                            | 12 |
| Table S2. Association of Patient Characteristics at Baseline and at SCT with VOD Occurrence in Patients Receiving InO ..... | 14 |

## Study Investigators

| Country           | Investigators                                                                                                                                                                                                                                       |
|-------------------|-----------------------------------------------------------------------------------------------------------------------------------------------------------------------------------------------------------------------------------------------------|
| Australia         | Anthony P. Schwarzer                                                                                                                                                                                                                                |
| Canada            | Andre Schuh                                                                                                                                                                                                                                         |
| China             | Hu Chen, Wenming Chen, Bin Jiang, Wei Li, Yongping Song, Jianxiang Wang                                                                                                                                                                             |
| Czech Republic    | Jan Horacek, Jiri Mayer, Heidi Mocikova                                                                                                                                                                                                             |
| Finland           | Kimmo Porkka                                                                                                                                                                                                                                        |
| France            | Caroline Bonmati, Jean-Yves Cahn, Denis Caillot, Sylvie Castaigne, Francoise Rigal-Huguet, Xavier Thomas, Pascal Turlure, Norbert Vey                                                                                                               |
| Germany           | Eike Buss, Nicola Gökbuget, Karl-Anton Kreuzer, Matthias Stelljes                                                                                                                                                                                   |
| Hungary           | Tamas Masszi, Miklos Udvardy                                                                                                                                                                                                                        |
| Italy             | Emanuele Angelucci, Anna Candoni, Angelo Michele Carella, Carlo Castagnola, Antonio Cuneo, Francesco Di Raimondo, Pier Paolo Fattori, Felicetto Ferrara, Carlo Gambacorti-Passerini, Marco Gobbi, Laura Marbello, Giovanni Martinelli, Eliana Zuffa |
| Japan             | Yasunobu Abe, Kiyoshi Ando, Naohito Fujishima, Masayuki Hino, Yukio Kobayashi, Masaya Okada, Yasushi Onishi, Toshiki Uchida                                                                                                                         |
| Republic of Korea | Chul Won Jung, Dae-Young Kim, Deok-Hawn Yang                                                                                                                                                                                                        |
| Netherlands       | Anita Rijneveld                                                                                                                                                                                                                                     |
| Poland            | Anna Ejduk, Andrzej Hellmann, Tadeusz Robak                                                                                                                                                                                                         |
| Taiwan            | Ming Chung Wang, Shang-Ju Wu                                                                                                                                                                                                                        |
| Spain             | Maria Calbacho Robles, Antonia Cladera Serra, Patricia Font Lopez, Laura Fox, Jose Gonzalez Campos, Jesus Hernandez, Pilar Martinez Sanchez, Josep Maria Ribera Santasusana, Mar Tormo Diaz                                                         |
| Singapore         | Yeow Tee Goh, Koh Liang Piu                                                                                                                                                                                                                         |
| Sweden            | Per Bernell, Beata Tomaszewska-Toporska                                                                                                                                                                                                             |
| United Kingdom    | Sahra Ali, Adele Fielding, David Marks, Kim Orchard, Andrew Peniket                                                                                                                                                                                 |

---

| <b>Country</b> | <b>Investigators</b>                                                                                                                                                                                                                                                                                                                                                                                                                                                                                                                                                                                                                                                                                            |
|----------------|-----------------------------------------------------------------------------------------------------------------------------------------------------------------------------------------------------------------------------------------------------------------------------------------------------------------------------------------------------------------------------------------------------------------------------------------------------------------------------------------------------------------------------------------------------------------------------------------------------------------------------------------------------------------------------------------------------------------|
| United States  | Sunil Abhyankar, Anjali Advani, Julie Asch, Farrukh Awan, Robert Berryman, Dale Bixby, Thomas Carter, Ryan Cassaday, Mohamad Cherry, Robert Collins, Brenda Cooper, Michael Craig, Kevin David, Daniel De Angelo, Guillermo De Angulo, William Ehmann, Ashkan Emadi, Matthew Foster, Olga Frankfurt, Cecilia Fu, Ivana Gojo, Stuart Goldberg, Julio Hajdenberg, Leonard Heffner, Hagop Kantarjian, Jonathan Kolitz, Michaela Liedtke, Elizabeth McGuire, Stephen Medlin, Akil Merchant, Steven Neudorf, Kristen O'Dwyer, Nikolai Podoltsev, Daniel A. Pollyea, Bayard Powell, Ellen Ritchie, Gary Schiller, Leonard Sender, Scott Solomon, Don Stevens, Wendy Stock, Robert Stuart, Matthew Wieduwilt, Jay Yang |

---

## **Additional Methods**

### *a. Eligibility Criteria*

Patients with peripheral absolute lymphoblast count  $\geq 10,000/\mu\text{L}$  were excluded (hydroxyurea and/or steroids/vincristine treatment within 2 weeks of randomization was allowed to reduce circulating blasts). Patients with lymphoblastic lymphoma were included provided they satisfied all eligibility criteria; patients with Burkitt lymphoma were excluded. Patients had an Eastern Cooperative Oncology Group performance status  $\leq 2$ ; adequate hepatic function (total serum bilirubin  $\leq 1.5 \times$  upper limit of normal [ULN]; except for documented Gilbert syndrome;  $\leq 2 \times$  ULN for hepatic abnormalities considered tumor-related]; alanine aminotransferase and aspartate aminotransferase  $\leq 2.5 \times$  ULN); serum creatinine  $\leq 1.5 \times$  ULN or any serum creatinine level associated with a measured or calculated creatinine clearance of  $\geq 40$  mL/min; unresponsive to prior treatment with  $\geq 1$  second/third generation TKIs and standard induction chemotherapy (patients with Ph+ ALL only); no isolated testicular or central nervous system (CNS) extramedullary relapse, active CNS leukemia or mixed phenotype ALL; no chemotherapy  $< 2$  weeks before randomization (except to reduce the circulating lymphoblast count or palliation [steroids, hydroxycarbamide, or vincristine]; for maintenance therapy [mercaptopurine, methotrexate, vincristine, thioguanine, and/or TKIs]; no monoclonal antibody treatment  $< 6$  weeks before randomization ( $\geq 2$  weeks before randomization for rituximab); no allogeneic hematopoietic stem cell transplantation (HSCT)  $\leq 4$  months before randomization.

*b. Recommended Dose Modifications*

For each arm, treatment was delayed unless patients demonstrated the following: no evidence of progressive disease; recovery to grade 1 or baseline from treatment-related, nonhematologic AEs (except alopecia); adequate hepatic and renal function (as defined for study eligibility except  $\leq 2 \times$  ULN for creatinine clearance); adequate bone marrow function (for patients with pretreatment absolute neutrophil count [ANC]  $\geq 1000/\mu\text{L}$  and platelet count  $\geq 50,000/\mu\text{L}$ , ANC and platelet count must be equal to  $\geq 1000/\mu\text{L}$  and  $\geq 50,000/\mu\text{L}$ , respectively; patients with baseline ANC  $< 1000/\mu\text{L}$  and/or platelet count  $< 50,000/\mu\text{L}$  must recover at least to levels obtained for the prior cycle, or the most recent bone marrow assessment must demonstrate stable or improved disease and ANC and platelet count are believed to be low due to disease); average Fridericia QTc interval of  $\leq 470$  ms (confirmed before cycles 1, 2 and 4 only). For patients not meeting the above criteria, administration of InO could be delayed for  $\leq 28$  days; however, any further delay due to a treatment-related toxicity resulted in permanent treatment discontinuation.

Treatment cycle 1 could be extended to 28 days for patients in CR or CRi, or to allow for recovery from toxicity. Dose delays due to treatment-related AEs lasting  $> 7$  days resulted in omission of the next dose within the treatment cycle, but patients were still eligible to receive subsequent planned doses if there were at least 6 days between doses. For patients in the InO arm whose treatment was delayed  $\geq 14$  days due to a treatment-related toxicity, InO treatment was resumed upon adequate recovery, with a 25% dose reduction to  $0.375 \text{ mg}/\text{m}^2$  for 1 subsequent cycle; patients requiring further dose reduction received 2 rather than 3 InO doses in subsequent cycles.

*c. Hematologic Remission Assessed by the Endpoint Adjudication Committee*

Complete response was defined as the disappearance of leukemia as indicated by <5% marrow blasts and the absence of peripheral blasts, with recovery of hematopoiesis defined by ANC  $\geq 1000/\mu\text{L}$  and platelets  $\geq 100,000/\mu\text{L}$ . C1 extramedullary disease status is required; patients were considered to have C1 extramedullary disease status if the following criteria were met:

1. Complete disappearance of all measurable and nonmeasurable extramedullary disease with the exception of lesions for which the following had to be true: For patients with at least 1 measurable lesion, all nodal masses >1.5 cm in greatest transverse diameter (GTD) at baseline must have regressed to  $\leq 1.5$  cm in GTD; all nodal masses  $\geq 1$  and  $\leq 1.5$  cm in GTD at baseline must have regressed to <1 cm GTD or they must have been reduced by 75% in sum of products of greatest diameters.
2. No new lesions.
3. Spleen and other previously enlarged organs must have regressed in size and must not be palpable.
4. All disease must be assessed using the same technique as at baseline.

CRi was defined as CR except with ANC  $< 1000/\mu\text{L}$  and/or platelets  $< 100,000/\mu\text{L}$ .

*d. Definitions of Duration of Remission, Overall Survival and Progression-Free Survival*

For patients with CR/CRi, remission duration was defined as the duration from remission to progressive disease (objective progression, relapse, treatment discontinuation due to health deterioration) or death. Overall survival was defined as the time from randomization to death due to any cause, censored at the last known alive date; progression-free survival was defined as the time from randomization to the earliest of disease progression (including objective progression, relapse from CR/CRi, treatment discontinuation due to global deterioration of health status), starting new induction therapy or poststudy SCT without achieving CR/CRi, or death due to any cause, censored at the last valid disease assessment. In addition, subjects with documentation of an event after an unacceptably long interval (>28 weeks if there was post-baseline disease assessment, or >12 weeks if there was no post-baseline assessment) since the previous disease assessment were censored at the time of the previous assessment (date of randomization if no post-baseline assessment).

*e. Definition and Confirmation of Veno-occlusive Disease*

Veno-occlusive disease/sinusoidal obstruction syndrome (VOD/SOS) was assessed and diagnosed by the investigators and evaluated according to previously defined clinical criteria and required the occurrence of 2 or more of the following events: hyperbilirubinemia (>34  $\mu\text{mol/L}$  or >2 mg/dL), ascites or sudden weight gain (>2.5% of baseline body weight), and painful hepatomegaly. Diagnosis also required no other explanation for these signs and symptoms (eg, septicemia, cyclosporine toxicity, heart failure, hepatitis). An external, blinded, independent Hepatic Events Adjudication Board



(HEAB), also reviewed all significant hepatic events, including all potential cases of VOD/SOS. The findings of the HEAB will be presented in a separate manuscript.

*f. Details of Statistical Analyses*

The sample size was calculated to adequately assess differences in CR/CRi and overall survival independently by splitting the 1-sided alpha of 0.025 evenly between the 2 primary endpoints. With 218 patients and 1-sided alpha of 0.0125, the study had  $\geq 88.5\%$  power to detect a difference in CR/CRi probabilities of 61% in the inotuzumab ozogamicin arm versus 37% in the standard care arm; with 248 overall survival events and 1-sided alpha of 0.0125, the study had 80% power to detect a difference in overall survival (median of 6.45 months in the inotuzumab ozogamicin arm and 4.30 months in the standard arm; hazard ratio [HR], 0.67). All reported *P* values are 2-sided.

Two prespecified interim analyses of overall survival for futility (first interim analysis) and efficacy and futility (second interim analysis) were performed when approximately 25% and  $\geq 60\%$  of the required 248 overall survival events, respectively, occurred. At both interim analyses, the External Data Monitoring Committee recommended the study be continued as planned. The final overall survival analysis was prespecified to occur after 248 events. The actual *P*-value boundaries for efficacy and futility were derived using the interpolated spending function, and were based on the actual number of overall survival events at the interim and final analyses. To account for decreases in alpha due to the 2 interim analyses, the significance level to detect a difference in the primary endpoint was adjusted to 0.0208. Progression-free survival was analyzed concurrently with the final overall survival analysis; both were stratified by randomization stratification factors.

**Figure S1. Patient Disposition.**

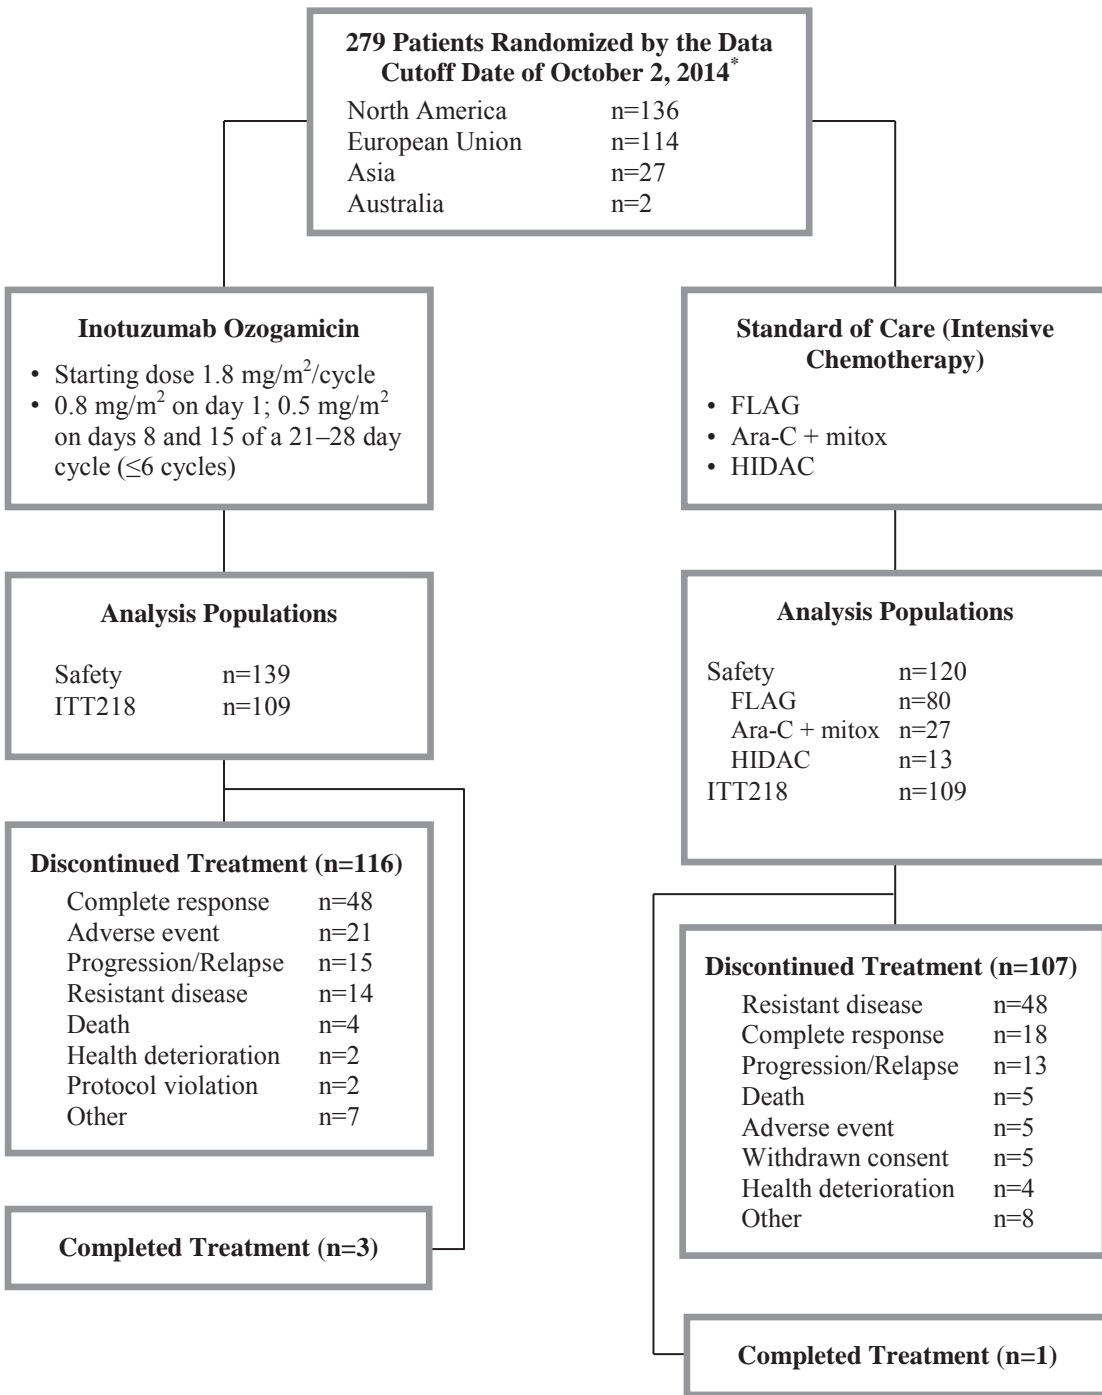

Ara-C=cytarabine; FLAG=fludarabine/

Ara-C/granulocyte-colony stimulating factor; HIDAC=high-dose Ara-C; ITT=intent-to-treat; Mitox=mitoxantrone. The ITT218 population includes the first 218 patients

randomized and is the primary population for the CR/CRi analysis. The safety population includes all randomized patients who received  $\geq 1$  dose of study drug by October 2, 2014. Patients who completed treatment received the maximum number of doses allowed per protocol. An additional 47 patients were randomized after this cut-off date for a total of 326 patients; these 47 patients were included in the survival analysis based on the ITT population of 326 patients. The prespecified requirement for  $>248$  events to trigger the final overall survival analysis was achieved on March 8, 2016 when 252 events were observed.

**Figure S2. Duration of Remission by Minimal Residual Disease Status.**

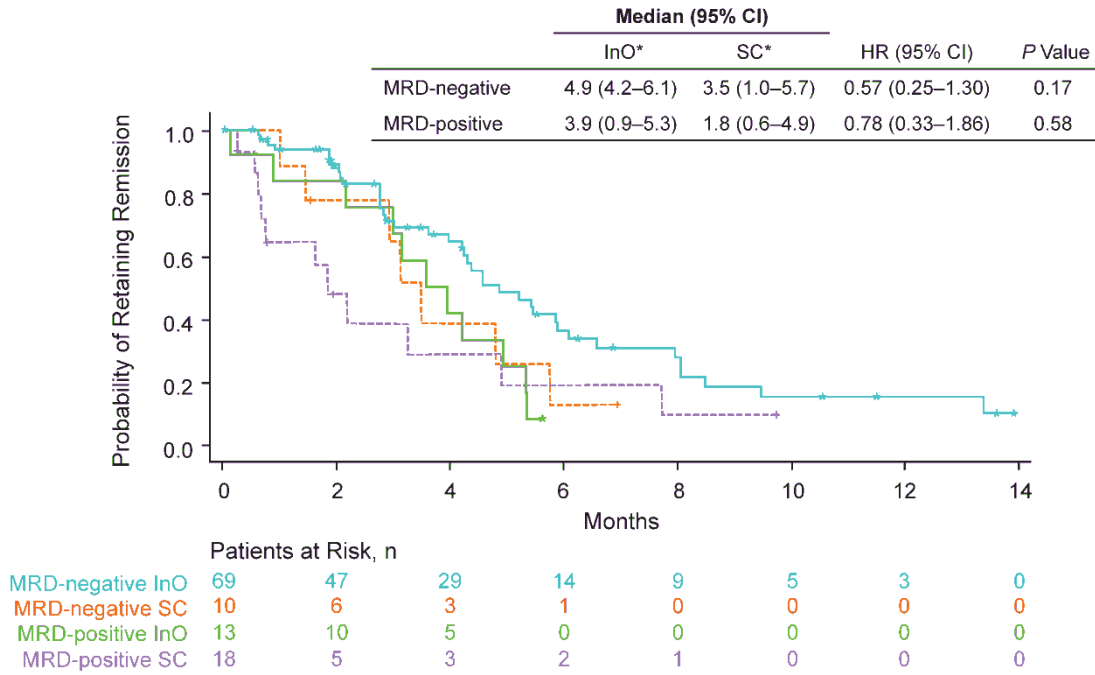

HR=hazard ratio; InO=inotuzumab ozogamicin; MRD=minimal residual disease; SC=standard of care.

\*Among patients achieving CR/CRi per investigator's assessment.

P values are from a 2-sided, unstratified log-rank test; HRs and corresponding 95% CIs are from unstratified Cox proportional hazard regression.

**Table S1. All-Cause and Treatment-Related Treatment-Emergent Adverse Events**

|                     | InO (n=139) |          |                   |          | SC (n=120) |          |                   |          |
|---------------------|-------------|----------|-------------------|----------|------------|----------|-------------------|----------|
|                     | All-Cause   |          | Treatment-Related |          | All-Cause  |          | Treatment-Related |          |
|                     | All Grade   | Grade ≥3 | All Grade         | Grade ≥3 | All Grade  | Grade ≥3 | All Grade         | Grade ≥3 |
| Any AE,*† n (%)     | 136 (98)    | 126 (91) | 119 (86)          | 96 (69)  | 119 (99)   | 114 (95) | 109 (91)          | 93 (78)  |
| Thrombocytopenia    | 62 (45)     | 51 (37)  | 40 (29)           | 28 (20)  | 73 (61)    | 71 (59)  | 57 (48)           | 56 (47)  |
| Neutropenia         | 67 (48)     | 64 (46)  | 50 (36)           | 47 (34)  | 53 (44)    | 50 (42)  | 46 (38)           | 43 (36)  |
| Anemia              | 42 (30)     | 26 (19)  | 25 (18)           | 15 (11)  | 64 (53)    | 48 (40)  | 46 (38)           | 35 (29)  |
| Nausea              | 44 (32)     | 3 (2)    | 21 (15)           | 0        | 56 (47)    | 0        | 41 (34)           | 0        |
| Febrile neutropenia | 37 (27)     | 33 (24)  | 22 (16)           | 20 (14)  | 62 (52)    | 59 (49)  | 51 (43)           | 48 (40)  |
| Pyrexia             | 37 (27)     | 5 (4)    | 15 (11)           | 2 (1)    | 51 (43)    | 6 (5)    | 30 (25)           | 3 (3)    |
| Leukopenia          | 38 (27)     | 35 (25)  | 23 (17)           | 21 (15)  | 47 (39)    | 47 (39)  | 31 (26)           | 31 (26)  |
| Diarrhea            | 25 (18)     | 1 (1)    | 8 (6)             | 0        | 48 (40)    | 1 (1)    | 27 (23)           | 1 (1)    |
| Headache            | 39 (28)     | 2 (1)    | 13 (9)            | 1 (1)    | 33 (28)    | 0        | 9 (8)             | 0        |
| Lymphopenia         | 24 (17)     | 22 (16)  | 15 (11)           | 15 (11)  | 34 (28)    | 34 (28)  | 22 (18)           | 22 (18)  |
| Vomiting            | 24 (17)     | 1 (1)    | 10 (7)            | 0        | 28 (23)    | 0        | 19 (16)           | 0        |
| Constipation        | 23 (17)     | 0        | 9 (7)             | 0        | 28 (33)    | 0        | 9 (8)             | 0        |
| Fatigue             | 31 (22)     | 4 (3)    | 13 (9)            | 2 (1)    | 17 (14)    | 2 (2)    | 12 (10)           | 1 (1)    |
| Hypokalemia         | 23 (17)     | 10 (7)   | 7 (5)             | 3 (2)    | 23 (19)    | 3 (3)    | 11 (9)            | 2 (2)    |
| AST increased       | 28 (20)     | 7 (5)    | 13 (9)            | 1 (1)    | 12 (10)    | 4 (3)    | 5 (4)             | 1 (1)    |
| Insomnia            | 21 (15)     | 0        | 6 (4)             | 0        | 18 (15)    | 0        | 2 (2)             | 0        |
| Abdominal pain      | 19 (14)     | 3 (2)    | 5 (4)             | 1 (1)    | 20 (17)    | 1 (1)    | 11 (9)            | 1 (1)    |
| Rash                | 13 (9)      | 0        | 4 (3)             | 0        | 23 (19)    | 0        | 13 (11)           | 0        |
| Cough               | 15 (11)     | 0        | 0                 | 0        | 21 (18)    | 1 (1)    | 4 (3)             | 0        |
| GGT increased       | 24 (17)     | 12 (9)   | 16 (12)           | 6 (4)    | 9 (8)      | 5 (4)    | 1 (1)             | 1 (1)    |
| Hyperbilirubinemia  | 21 (15)     | 5 (4)    | 10 (7)            | 4 (3)    | 12 (10)    | 4 (3)    | 6 (5)             | 3 (3)    |
| Epistaxis           | 21 (15)     | 1 (1)    | 5 (4)             | 1 (1)    | 11 (9)     | 2 (2)    | 3 (3)             | 0        |

|                      |         |        |        |        |         |       |         |       |
|----------------------|---------|--------|--------|--------|---------|-------|---------|-------|
| ALT increased        | 19 (14) | 4 (3)  | 10 (7) | 1 (1)  | 13 (11) | 4 (3) | 5 (4)   | 0     |
| Hypotension          | 11 (8)  | 0      | 3 (2)  | 0      | 20 (17) | 5 (4) | 4 (3)   | 1 (1) |
| Appetite decreased   | 13 (9)  | 2 (1)  | 6 (4)  | 2 (1)  | 16 (13) | 3 (3) | 12 (10) | 2 (2) |
| Chills               | 14 (10) | 0      | 6 (4)  | 0      | 14 (12) | 0     | 8 (7)   | 0     |
| Pain in extremity    | 12 (9)  | 0      | 0      | 0      | 15 (13) | 1 (1) | 4 (3)   | 1 (1) |
| Dizziness            | 12 (9)  | 0      | 3 (2)  | 0      | 13 (11) | 0     | 4 (3)   | 0     |
| Asthenia             | 13 (9)  | 3 (2)  | 5 (4)  | 2 (1)  | 12 (10) | 2 (2) | 5 (4)   | 0     |
| Peripheral edema     | 12 (9)  | 1 (1)  | 1 (1)  | 0      | 12 (10) | 0     | 3 (3)   | 0     |
| Dyspnea              | 7 (5)   | 1 (1)  | 1 (1)  | 0      | 16 (13) | 2 (2) | 4 (3)   | 0     |
| ALP increased        | 16 (12) | 2 (1)  | 8 (6)  | 1 (1)  | 7 (6)   | 1 (1) | 4 (3)   | 1 (1) |
| Hypocalcemia         | 11 (8)  | 2 (1)  | 2 (1)  | 1 (1)  | 12 (10) | 3 (3) | 3 (3)   | 1 (1) |
| Mucosal inflammation | 5 (4)   | 1 (1)  | 3 (2)  | 1 (1)  | 15 (13) | 3 (3) | 11 (9)  | 2 (2) |
| Tachycardia          | 6 (4)   | 0      | 1 (1)  | 0      | 12 (10) | 1 (1) | 2 (2)   | 0     |
| VOD                  | 15 (11) | 13 (9) | 13 (9) | 11 (8) | 1 (1)   | 1 (1) | 0       | 0     |
| Lipase increased     | 14 (10) | 6 (4)  | 10 (7) | 4 (3)  | 0       | 0     | 0       | 0     |

AE=adverse event; ALP=alkaline phosphatase; ALT=alanine aminotransferase; AST=aspartate aminotransferase; GGT=gamma-glutamyltransferase; InO=inotuzumab ozogamicin; SC=standard of care; VOD=veno-occlusive disease.

\*Data represent the safety population (data cutoff date of October 2, 2014); adverse events were graded according to the National Cancer Institute Common Terminology Criteria for Adverse Events version 3.0.

†All-cause AEs with  $\geq 10\%$  incidence occurring in either arm in the safety population (any treatment cycle) in descending order of total frequency across arms.

**Table S2. Association of Patient Characteristics at Baseline and at SCT with VOD Occurrence in Patients Receiving InO**

| Characteristic                                                           | Estimate | <i>P</i><br>Value | Odds Ratio<br>(95% CI) |
|--------------------------------------------------------------------------|----------|-------------------|------------------------|
| <b>Univariate analysis</b>                                               |          |                   |                        |
| Age ( $\geq 55$ y [n=12] vs $< 55$ y [n=36])                             | 0.92     | 0.23              | 2.5 (0.6–11.1)         |
| ECOG performance status (2 [n=5] vs $< 2$ [n=43])                        | –0.06    | 0.96              | 0.94 (0.1–9.5)         |
| Duration* (continuous [n=48])                                            | 0.00     | 0.81              | 1.0 (1.0–1.0)          |
| Dual vs single alkylator conditioning (n=9 vs n=34)                      | 1.79     | 0.04              | 6.0 (1.1–32.1)         |
| Busulfan containing conditioning regimen (yes [n=9] vs no [n=39])        | 1.48     | 0.07              | 4.4 (0.9–21.3)         |
| Type of SCT (myeloablative [n=33] vs nonmyeloablative [n=15])            | 0.07     | 0.92              | 1.1 (0.2–4.9)          |
| SCT donor (alternative [n=32] vs matched related [n=15])                 | 1.70     | 0.13              | 5.5 (0.6–48.0)         |
| Prior SCT (yes [n=7] vs no [n=41])                                       | 1.29     | 0.14              | 3.6 (0.7–20.0)         |
| Number of treatment cycles received (continuous [n=48])                  | 0.06     | 0.86              | 1.1 (0.6–2.0)          |
| Salvage status ( $\geq 2$ [n=11] vs 1 [n=36])                            | 1.05     | 0.17              | 2.9 (0.6–12.9)         |
| Liver function test abnormalities <sup>†</sup> (yes [n=24] vs no [n=24]) | –0.51    | 0.48              | 0.6 (0.1–2.5)          |
| History of liver disease/hepatitis (yes [n=16] vs no [n=32])             | 0.90     | 0.22              | 2.5 (0.6–10.2)         |
| <b>Multivariate analysis</b>                                             |          |                   |                        |
| Dual vs single alkylator conditioning (n=8 vs n=33)                      | 1.72     | 0.04              | 5.6 (1.0–30.1)         |

ECOG=Eastern Cooperative Oncology Group; InO=inotuzumab ozogamicin; SCT=stem cell transplant; TBI=total body irradiation; VOD=veno-occlusive disease.

The second level is the reference level for interpretation of odds ratios for categorical factors.

\*Time from last dose of study treatment to first date of conditioning.

<sup>†</sup>Includes alanine/aspartate aminotransferase and bilirubin elevations.
